# Supplementary material
Source: HighWire-hosted journal article supplement (https://www.jrheum.org/highwire/filestream/36564/field_highwire_adjunct_files/0/181376DataSuppl.pdf)
Supplement: 181376DataSuppl.pdf [file 181376DataSuppl.pdf]

**Supplementary Figure 1.** Patient-administered survey to assess vaccination coverage and patient-reported barriers for non-vaccination.

MUHC RHEUMATOLOGY SURVEY                      STUDY NUMBER \_\_\_\_\_

**WE WOULD LIKE TO LEARN MORE ABOUT VACCINATIONS THAT OUR PATIENTS RECEIVE. THANK YOU FOR COMPLETING THIS QUESTIONNAIRE.**

How old are you? \_\_\_\_\_ years-old                      Are you a: \_\_\_\_\_ Female \_\_\_\_\_ Male

Do you have a primary care doctor that you see at least each year for routine care: \_\_\_\_\_ Yes \_\_\_\_\_ No

**Which disease are you seeing the doctor for and for how long have you had that disease? (CIRCLE ALL THAT APPLY)**

Rheumatoid Arthritis - Year of diagnosis \_\_\_\_\_                      Psoriatic Arthritis - Year of diagnosis \_\_\_\_\_

Ankylosing Spondylitis - Year of diagnosis \_\_\_\_\_                      Lupus - Year of diagnosis \_\_\_\_\_

Vasculitis - Year of diagnosis \_\_\_\_\_

Other rheumatic disease (which one?) \_\_\_\_\_ - Year of diagnosis \_\_\_\_\_

**Have you ever been diagnosed with any of the following conditions? (CIRCLE ALL THAT APPLY)**

Cancer                      Diabetes                      Alcoholism                      HIV                      Kidney disease

**Which medications do you take? (CIRCLE ALL THAT APPLY)**

Methotrexate                      Dose per week: \_\_\_\_\_

Humira (Adalimumab), Cimzia (Certolizumab), Simponi (Golimumab), Remicade (Infliximab), Enbrel (Etanercept)

Orencia (Abatacept), Rituxan (Rituximab), Actemra (Tocilizumab)

Arava (Leflunomide)

Azulfidine (Sulfasalazine)

Plaquenil (Hydroxychloroquine)

Imuran (Azathioprine)

Cytosan (Cyclophosphamide)

Xeljanz (Tofacitinib)

Cellcept (Mycophenolate mofetil)                      Dose per day: \_\_\_\_\_

Steroids (e.g., Prednisone)                      Dose per day: \_\_\_\_\_

**Have you been told that any of the medicines you are taking make it easier for you to develop an infection?**

\_\_\_\_\_ Yes                      \_\_\_\_\_ No                      \_\_\_\_\_ NOT SURE

**Flu Vaccine**

Are you aware you can receive a shot (injection) to protect you against the flu each year? \_\_\_\_\_ Yes \_\_\_\_\_ No

Has a doctor ever recommended you get the flu shot? \_\_\_\_\_ Yes \_\_\_\_\_ No

Did you receive the flu shot this year? \_\_\_\_\_ Yes \_\_\_\_\_ No

**Pneumonia Vaccine (Pneumovax)**

Are you aware you can receive a shot (injection) to protect against pneumonia (lung infection)? \_\_\_\_\_ Yes \_\_\_\_\_ No

Has your doctor ever recommended you get the pneumonia vaccination? \_\_\_\_\_ Yes \_\_\_\_\_ No

Which doctor? \_\_\_\_\_ Rheumatologist \_\_\_\_\_ My Primary Care \_\_\_\_\_ Both \_\_\_\_\_ Other (pharmacist, nurse) \_\_\_\_\_

Have you ever received the pneumonia vaccine? \_\_\_\_\_ Yes \_\_\_\_\_ No

If yes, how long ago: \_\_\_\_\_ Where (MUHC, CLSC, other medical office): \_\_\_\_\_

**Hepatitis B vaccine (Twinrix, Engerix-B; Recombivax HB)**

Are you aware you can receive a shot (injection) to protect you against hepatitis B? \_\_\_\_\_ Yes \_\_\_\_\_ No

Has a doctor ever recommended you get the hepatitis B shot? \_\_\_\_\_ Yes \_\_\_\_\_ No

Did you receive the three doses of hepatitis B vaccine? \_\_\_\_\_ Yes \_\_\_\_\_ No

Did you receive the 1 or 2 doses of hepatitis B vaccine? \_\_\_\_\_ Yes \_\_\_\_\_ No

If yes, where? (MUHC clinic, CLSC, other medical office): \_\_\_\_\_

If not, why not? \_\_\_\_\_

**Zoster vaccine (Zostavax)**

Are you aware you can receive a shot (injection) to protect you against zona/herpes zoster? \_\_\_\_\_ Yes \_\_\_\_\_ No

Has a doctor ever recommended you get the zona/herpes zoster vaccine? \_\_\_\_\_ Yes \_\_\_\_\_ No

Did you receive zona/herpes zoster vaccine? \_\_\_\_\_ Yes \_\_\_\_\_ No

If not, why not? \_\_\_\_\_

Have you ever had zona/herpes zoster? \_\_\_\_\_ Yes \_\_\_\_\_ No

Thank you for completing this survey. Please give this to the receptionist when completed.

**Supplementary Table 1.** Disease classification for RA, SARD, SpA, and OD groups

| <b>Disease Classification</b>                        | <b>Specific Condition</b>              | <b>Patient Frequency</b> |
|------------------------------------------------------|----------------------------------------|--------------------------|
| <b>Rheumatoid arthritis (RA)</b>                     | Rheumatoid arthritis                   | 131                      |
|                                                      | Juvenile idiopathic arthritis (JIA)    | 4                        |
|                                                      | Seronegative arthritis                 | 1                        |
|                                                      | <b>Total</b>                           | <b>136</b>               |
| <b>Systemic autoimmune rheumatic diseases (SARD)</b> | Systemic lupus erythematosus (SLE)     | 69                       |
|                                                      | Vasculitis                             | 25                       |
|                                                      | Sjögren's syndrome                     | 7                        |
|                                                      | Inflammatory myositis                  | 5                        |
|                                                      | Mixed connective tissue disease (MCTD) | 4                        |
|                                                      | Systemic sclerosis                     | 3                        |
|                                                      | <b>Total</b>                           | <b>113</b>               |
| <b>Spondyloarthropathies (SpA)</b>                   | Ankylosing spondylitis                 | 22                       |
|                                                      | Psoriatic arthritis                    | 21                       |
|                                                      | Crohn's disease                        | 1                        |
|                                                      | Reactive arthritis                     | 1                        |
|                                                      | SAPHO                                  | 1                        |
|                                                      | Ulcerative colitis                     | 1                        |
|                                                      | <b>Total</b>                           | <b>47</b>                |
| <b>Other diseases (OD)*</b>                          | Osteoarthritis                         | 27                       |
|                                                      | Fibromyalgia                           | 12                       |
|                                                      | Crystal arthropathies                  | 11                       |
|                                                      | Trigger finger                         | 1                        |
|                                                      | Adhesive capsulitis                    | 1                        |
|                                                      | Bursitis                               | 1                        |
|                                                      | Hip calcification                      | 1                        |
|                                                      | Irritable bowel syndrome               | 1                        |
|                                                      | Migraine                               | 1                        |
|                                                      | <b>Total</b>                           | <b>56</b>                |

\*Patients included in the OD group were not being treated with DMARD/biologics

**Supplementary Table 2.** Results of univariate logistic regression models for influenza vaccination (n = 312)

| Variable                                              | Frequency (%)<br>or<br>mean $\pm$ SD | % Vaccinated<br>(Influenza 2014-<br>2015 season) | OR<br>(95% CI)     | P-Value |
|-------------------------------------------------------|--------------------------------------|--------------------------------------------------|--------------------|---------|
| <b>Sex</b>                                            |                                      |                                                  |                    | 0.25    |
| Male                                                  | 77 (24.7)                            | 52.0                                             | <i>ref</i>         |         |
| Female                                                | 235 (75.3)                           | 44.4                                             | 0.74 (0.44 – 1.24) |         |
| <b>Age, years</b>                                     | 52.2 $\pm$ 17.2                      | –                                                | 1.04 (1.03 – 1.06) | < 0.001 |
| <b>Followed by a Primary Care Physician</b>           |                                      |                                                  |                    | 0.02    |
| No                                                    | 69 (22.8)                            | 33.3                                             | <i>ref</i>         |         |
| Yes                                                   | 234 (77.2)                           | 50.2                                             | 2.02 (1.15 – 3.54) |         |
| <b>Disease Duration (years)</b>                       | 9.0 $\pm$ 9.6                        | –                                                | 1.01 (0.99 – 1.04) | 0.40    |
| <b>Comorbidities <math>\Psi</math></b>                |                                      |                                                  |                    | 0.07    |
| No                                                    | 249 (79.3)                           | 43.3                                             | <i>ref</i>         |         |
| Yes                                                   | 65 (20.7)                            | 56.3                                             | 1.68 (0.97 – 2.93) |         |
| <b>Treatment</b>                                      |                                      |                                                  |                    | 0.83    |
| Neither                                               | 75 (23.9)                            | 44.6                                             | <i>ref</i>         |         |
| DMARD                                                 | 172 (54.8)                           | 48.2                                             | 1.16 (0.67 – 2.00) |         |
| Biologics                                             | 27 (8.6)                             | 40.7                                             | 0.85 (0.35 – 2.09) |         |
| DMARD and Biologics                                   | 40 (12.7)                            | 42.5                                             | 0.92 (0.42 – 2.00) |         |
| <b>Awareness of Benefits of Influenza Vaccination</b> |                                      |                                                  |                    | 0.001   |
| No                                                    | 29 (9.3)                             | 11.5                                             | <i>ref</i>         |         |
| Yes                                                   | 282 (90.7)                           | 49.6                                             | 7.56 (2.22 – 25.7) |         |
| <b>Influenza Vaccine Recommended by Physician</b>     |                                      |                                                  |                    | < 0.001 |
| No                                                    | 79 (25.8)                            | 9.0                                              | <i>ref</i>         |         |
| Yes                                                   | 227 (74.2)                           | 59.0                                             | 14.6 (6.44 – 33.2) |         |
| <b>Pneumococcal Vaccine</b>                           |                                      |                                                  |                    | < 0.001 |
| No                                                    | 161 (61.7)                           | 31.6                                             | <i>ref</i>         |         |
| Yes                                                   | 100 (38.3)                           | 70.0                                             | 5.04 (2.93 – 8.68) |         |
| <b>Disease Group</b>                                  |                                      |                                                  |                    | 0.004   |
| OD                                                    | 18 (5.7)                             | 88.9                                             | <i>ref</i>         |         |
| RA                                                    | 136 (43.4)                           | 48.5                                             | 0.12 (0.03 – 0.53) |         |
| SARD                                                  | 113 (36.0)                           | 42.0                                             | 0.09 (0.02 – 0.41) |         |
| SpA                                                   | 47 (15.0)                            | 31.9                                             | 0.06 (0.01 – 0.29) |         |

Patients in the RD groups are of any age, patients in OD group are  $\geq$  65 years-old.  $\Psi$  Comorbidities include cancer, diabetes, and renal disease. Note, renal disease was not considered a comorbidity in SLE patients (part of SARD). RA: rheumatoid arthritis; SARD: systemic autoimmune rheumatic diseases; SpA: spondyloarthropathies; OD: other diseases; DMARD: disease-modifying anti-rheumatic drugs; OR: odds ratio.

**Supplementary Table 3.** Results of univariate logistic regression models for pneumococcal vaccination (n = 312)

| Variable                                                 | Frequency (%)<br>or<br>mean $\pm$ SD | % Vaccinated<br>Pneumococcus | OR<br>(95% CI)     | P-Value |
|----------------------------------------------------------|--------------------------------------|------------------------------|--------------------|---------|
| <b>Sex</b>                                               |                                      |                              |                    | 0.96    |
| Male                                                     | 77 (24.7)                            | 38.3                         | <i>ref</i>         |         |
| Female                                                   | 235 (75.3)                           | 38.0                         | 0.99 (0.55 – 1.79) |         |
| <b>Age, years</b>                                        | 52.2 $\pm$ 17.2                      | –                            | 1.03 (1.01 – 1.04) | 0.001   |
| <b>Followed by a Primary Care Physician</b>              |                                      |                              |                    | 0.77    |
| No                                                       | 69 (22.8)                            | 37.3                         | <i>ref</i>         |         |
| Yes                                                      | 234 (77.2)                           | 39.4                         | 1.09 (0.60 – 1.99) |         |
| <b>Disease Duration (years)</b>                          | 9.0 $\pm$ 9.6                        | –                            | 1.01 (0.98 – 1.04) | 0.52    |
| <b>Comorbidities <math>\Psi</math></b>                   |                                      |                              |                    | 0.27    |
| No                                                       | 249 (79.3)                           | 36.6                         | <i>ref</i>         |         |
| Yes                                                      | 65 (20.7)                            | 44.6                         | 1.40 (0.77 – 2.54) |         |
| <b>Treatment</b>                                         |                                      |                              |                    | 0.11    |
| Neither                                                  | 75 (23.9)                            | 29.3                         | <i>ref</i>         |         |
| DMARD                                                    | 172 (54.8)                           | 39.9                         | 1.60 (0.83 – 3.08) |         |
| Biologics                                                | 27 (8.6)                             | 29.2                         | 0.99 (0.35 – 2.83) |         |
| DMARD and Biologics                                      | 40 (12.7)                            | 52.2                         | 2.70 (1.14 – 6.40) |         |
| <b>Awareness of Benefits of Pneumococcal Vaccination</b> |                                      |                              |                    | –       |
| No                                                       | 117 (41.8)                           | 0                            | –                  |         |
| Yes                                                      | 163 (58.2)                           | 64.1                         | –                  |         |
| <b>Pneumococcal Vaccine Recommended by Physician</b>     |                                      |                              |                    | < 0.001 |
| No                                                       | 164 (60.3)                           | 4.0                          | <i>ref</i>         |         |
| Yes                                                      | 108 (39.7)                           | 86.7                         | 156 (57.9 – 421)   |         |
| <b>Influenza Vaccine</b>                                 |                                      |                              |                    | < 0.001 |
| No                                                       | 168 (54.0)                           | 21.7                         | <i>ref</i>         |         |
| Yes                                                      | 143 (46.0)                           | 58.3                         | 5.04 (2.93 – 8.68) |         |
| <b>Disease Group</b>                                     |                                      |                              |                    | 0.57    |
| OD                                                       | 18 (5.7)                             | 33.3                         | <i>ref</i>         |         |
| RA                                                       | 136 (43.4)                           | 42.0                         | 1.45 (0.47 – 4.50) |         |
| SARD                                                     | 113 (36.0)                           | 37.8                         | 1.21 (0.38 – 3.85) |         |
| SpA                                                      | 47 (15.0)                            | 29.7                         | 0.85 (0.23 – 3.06) |         |

Patients in the RD groups are of any age, patients in OD group are  $\geq$  65 years-old.  $\Psi$  Comorbidities include cancer, diabetes, and renal disease. Note, renal disease was not considered a comorbidity in SLE patients (part of SARD). RA: rheumatoid arthritis; SARD: systemic autoimmune rheumatic diseases; SpA: spondyloarthropathies; OD: other diseases; DMARD: disease-modifying anti-rheumatic drugs; OR: odds ratio.

**Supplementary Table 4.** Results of univariate logistic regression models for HBV vaccination (n = 352)

| Variable                                        | Frequency (%)<br>or<br>mean $\pm$ SD | % Vaccinated<br>HBV | OR<br>(95% CI)     | P-Value |
|-------------------------------------------------|--------------------------------------|---------------------|--------------------|---------|
| <b>Sex</b>                                      |                                      |                     |                    | 0.12    |
| Male                                            | 86 (24.7)                            | 54.5                | <i>ref</i>         |         |
| Female                                          | 262 (75.3)                           | 43.5                | 0.64 (0.37 – 1.12) |         |
| <b>Age, years</b>                               | 51.8 $\pm$ 16.7                      | –                   | 0.96 (0.94 – 0.97) | < 0.001 |
| <b>Followed by a Primary Care Physician</b>     |                                      |                     |                    | 0.81    |
| No                                              | 76 (22.4)                            | 45.6                | <i>ref</i>         |         |
| Yes                                             | 264 (77.6)                           | 47.4                | 1.08 (0.60 – 1.95) |         |
| <b>Disease Duration (years)</b>                 | 8.7 $\pm$ 9.4                        | –                   | 0.97 (0.94 – 1.01) | 0.09    |
| <b>Comorbidities <sup>ψ</sup></b>               |                                      |                     |                    | 0.04    |
| No                                              | 277 (78.7)                           | 49.5                | <i>ref</i>         |         |
| Yes                                             | 75 (21.3)                            | 33.9                | 0.52 (0.28 – 0.97) |         |
| <b>Treatment</b>                                |                                      |                     |                    | 0.85    |
| Neither                                         | 113 (32.1)                           | 46.6                | <i>ref</i>         |         |
| DMARD                                           | 172 (48.9)                           | 44.4                | 0.92 (0.52 – 1.63) |         |
| Biologics                                       | 27 (7.7)                             | 45.5                | 0.96 (0.37 – 2.49) |         |
| DMARD and Biologics                             | 40 (11.4)                            | 53.3                | 1.31 (0.56 – 3.07) |         |
| <b>Awareness of Benefits of HBV Vaccination</b> |                                      |                     |                    | < 0.001 |
| No                                              | 85 (27.8)                            | 3.0                 | <i>ref</i>         |         |
| Yes                                             | 221 (72.2)                           | 61.3                | 51.4 (12.2 – 216)  |         |
| <b>HBV Vaccine Recommended by Physician</b>     |                                      |                     |                    | < 0.001 |
| No                                              | 194 (66.7)                           | 18.5                | <i>ref</i>         |         |
| Yes                                             | 97 (33.3)                            | 87.1                | 29.8 (14.4 – 61.7) |         |
| <b>Disease Group</b>                            |                                      |                     |                    | < 0.001 |
| OD                                              | 56 (15.9)                            | 36.8                | <i>ref</i>         |         |
| RA                                              | 136 (38.6)                           | 33.6                | 0.87 (0.40 – 1.88) |         |
| SARD                                            | 113 (32.1)                           | 55.6                | 2.14 (0.97 – 4.73) |         |
| SpA                                             | 47 (13.4)                            | 73.5                | 4.76 (1.74 – 13.0) |         |

<sup>ψ</sup> Comorbidities include cancer, diabetes, and renal disease. Note, renal disease was not considered a comorbidity in SLE patients (part of SARD). RA: rheumatoid arthritis; SARD: systemic autoimmune rheumatic diseases; SpA: spondyloarthropathies; OD: other diseases; DMARD: disease-modifying anti-rheumatic drugs; HBV: hepatitis B virus; OR: odds ratio.

**Supplementary Table 5.** Multivariate analysis to identify predictors of influenza vaccine recommendation by a physician

| Variable                                          | Odds Ratio | 95% CI      | P-Value |
|---------------------------------------------------|------------|-------------|---------|
| <b>Female</b>                                     | 0.64       | 0.28 – 1.46 | 0.29    |
| <b>Age, years</b>                                 | 1.02       | 1.00 – 1.05 | 0.06    |
| <b>Followed by a Primary Care Physician</b>       | 3.41       | 1.62 – 7.20 | 0.001   |
| <b>Disease Duration</b>                           | 1.07       | 1.02 – 1.12 | 0.01    |
| <b>Comorbidities <sup>ψ</sup></b>                 | 2.04       | 0.69 – 6.03 | 0.20    |
| <b>Awareness of Benefits of Influenza Vaccine</b> | 4.53       | 1.54 – 13.3 | 0.01    |
| <b>Treatment (Neither as reference group)</b>     |            |             | 0.06    |
| DMARD                                             | 2.86       | 1.07 – 7.66 |         |
| Biologics                                         | 2.26       | 0.57 – 9.05 |         |
| DMARD and Biologics                               | 6.25       | 1.62 – 24.1 |         |
| <b>Disease group (OD as reference group)</b>      |            |             | 0.31    |
| RA                                                | 0.18       | 0.02 – 2.05 |         |
| SARD                                              | 0.34       | 0.03 – 3.68 |         |
| SpA                                               | 0.26       | 0.02 – 2.88 |         |

Patients in the RD groups are of any age, patients in OD group are ≥ 65 years-old. <sup>ψ</sup> Comorbidities include cancer, diabetes, and renal disease. Note, renal disease was not considered a comorbidity in SLE patients (part of SARD). RA: rheumatoid arthritis; SARD: systemic autoimmune rheumatic diseases; SpA: spondyloarthropathies; OD: other diseases; DMARD: disease-modifying anti-rheumatic drugs; CI: confidence interval.

**Supplementary Table 6.** Multivariate analysis to identify predictors of pneumococcal vaccine recommendation by a physician

| Variable                                             | Odds Ratio | 95% CI      | P-Value |
|------------------------------------------------------|------------|-------------|---------|
| <b>Female</b>                                        | 0.36       | 0.11 – 1.15 | 0.09    |
| <b>Age, years</b>                                    | 1.03       | 1.00 – 1.06 | 0.05    |
| <b>Followed by a Primary Care Physician</b>          | 1.25       | 0.46 – 3.37 | 0.66    |
| <b>Disease Duration</b>                              | 0.99       | 0.95 – 1.04 | 0.74    |
| <b>Comorbidities <sup>ψ</sup></b>                    | 1.19       | 0.40 – 3.51 | 0.76    |
| <b>Awareness of Benefits of Pneumococcal Vaccine</b> | 401        | 40.7 – 3952 | < 0.001 |
| <b>Treatment (Neither as reference group)</b>        |            |             | 0.02    |
| DMARD                                                | 1.67       | 0.45 – 6.15 |         |
| Biologics                                            | 0.92       | 0.15 – 5.78 |         |
| DMARD and Biologics                                  | 18.2       | 2.50 - 132  |         |
| <b>Disease group (OD as reference group)</b>         |            |             | 0.95    |
| RA                                                   | 1.24       | 0.08 – 19.2 |         |
| SARD                                                 | 1.61       | 0.11 – 24.4 |         |
| SpA                                                  | 1.42       | 0.09 – 22.0 |         |

Patients in the RD groups are of any age, patients in OD group are ≥ 65 years-old. <sup>ψ</sup> Comorbidities include cancer, diabetes, and renal disease. Note, renal disease was not considered a comorbidity in SLE patients (part of SARD). RA: rheumatoid arthritis; SARD: systemic autoimmune rheumatic diseases; SpA: spondyloarthropathies; OD: other diseases; DMARD: disease-modifying anti-rheumatic drugs; CI: confidence interval.

**Supplementary Table 7.** Reasons for non-vaccination against influenza, HBV, and HZ

|                                    | <b>Influenza</b><br>(n = 168) | <b>HBV</b><br>(n = 140) | <b>HZ</b><br>(n = 84) |
|------------------------------------|-------------------------------|-------------------------|-----------------------|
| <b>Reasons for Non-Vaccination</b> | <b>Frequency (%)</b>          |                         |                       |
| No Clear Reasons                   | 2 (3.5)                       | 4 (7.5)                 | 6 (13.6)              |
| Not Interested                     | 19 (33.3)                     | 14 (26.4)               | 8 (18.2)              |
| Not Recommended                    | 7 (12.3)                      | 21 (39.6)               | 19 (43.2)             |
| Fear of Side Effects               | 9 (15.8)                      | —                       | —                     |
| Vaccine Misconceptions             | 19 (33.3)                     | 13 (24.5)               | 9 (20.5)              |
| Doubt about Vaccine Efficacy       | 1 (1.8)                       | 0                       | 0                     |
| HBV Positive                       | —                             | 1 (1.9)                 | —                     |
| Vaccine Cost                       | —                             | —                       | 2 (4.5)               |

HBV: hepatitis B virus; HZ: herpes zoster.
